# Supplementary material for: Frequency of Biopsy and Tumor Grade Before vs After Introduction of Prostate Magnetic Resonance Imaging
Source: PubMed Central journal article supplement (PMC10445184; doi:10.1001/jamanetworkopen.2023.30233), 2023-08-22
Supplement: jamanetwopen-e2330233-s001.pdf [file jamanetwopen-e2330233-s001.pdf]

## Supplemental Online Content

Robinson D, Abdulkareem R, Nasrollah D, et al. Frequency of biopsy and tumor grade before vs after introduction of prostate magnetic resonance imaging. *JAMA Netw Open*. 2023;6(8):e2330233. doi:10.1001/jamanetworkopen.2023.30233

**eFigure.** Consort Diagram of Men Included in the Study

**eTable.** Distribution of Prostate Cancer Characteristics by MRI Investigation for Men Diagnosed With Needle Biopsy Detected Prostate Cancer With First PSA Between 3 and 20 ng/ml and Age Below 80 Years

This supplemental material has been provided by the authors to give readers additional information about their work.

**eFigure.** Consort Diagram of Men Included in the Study.

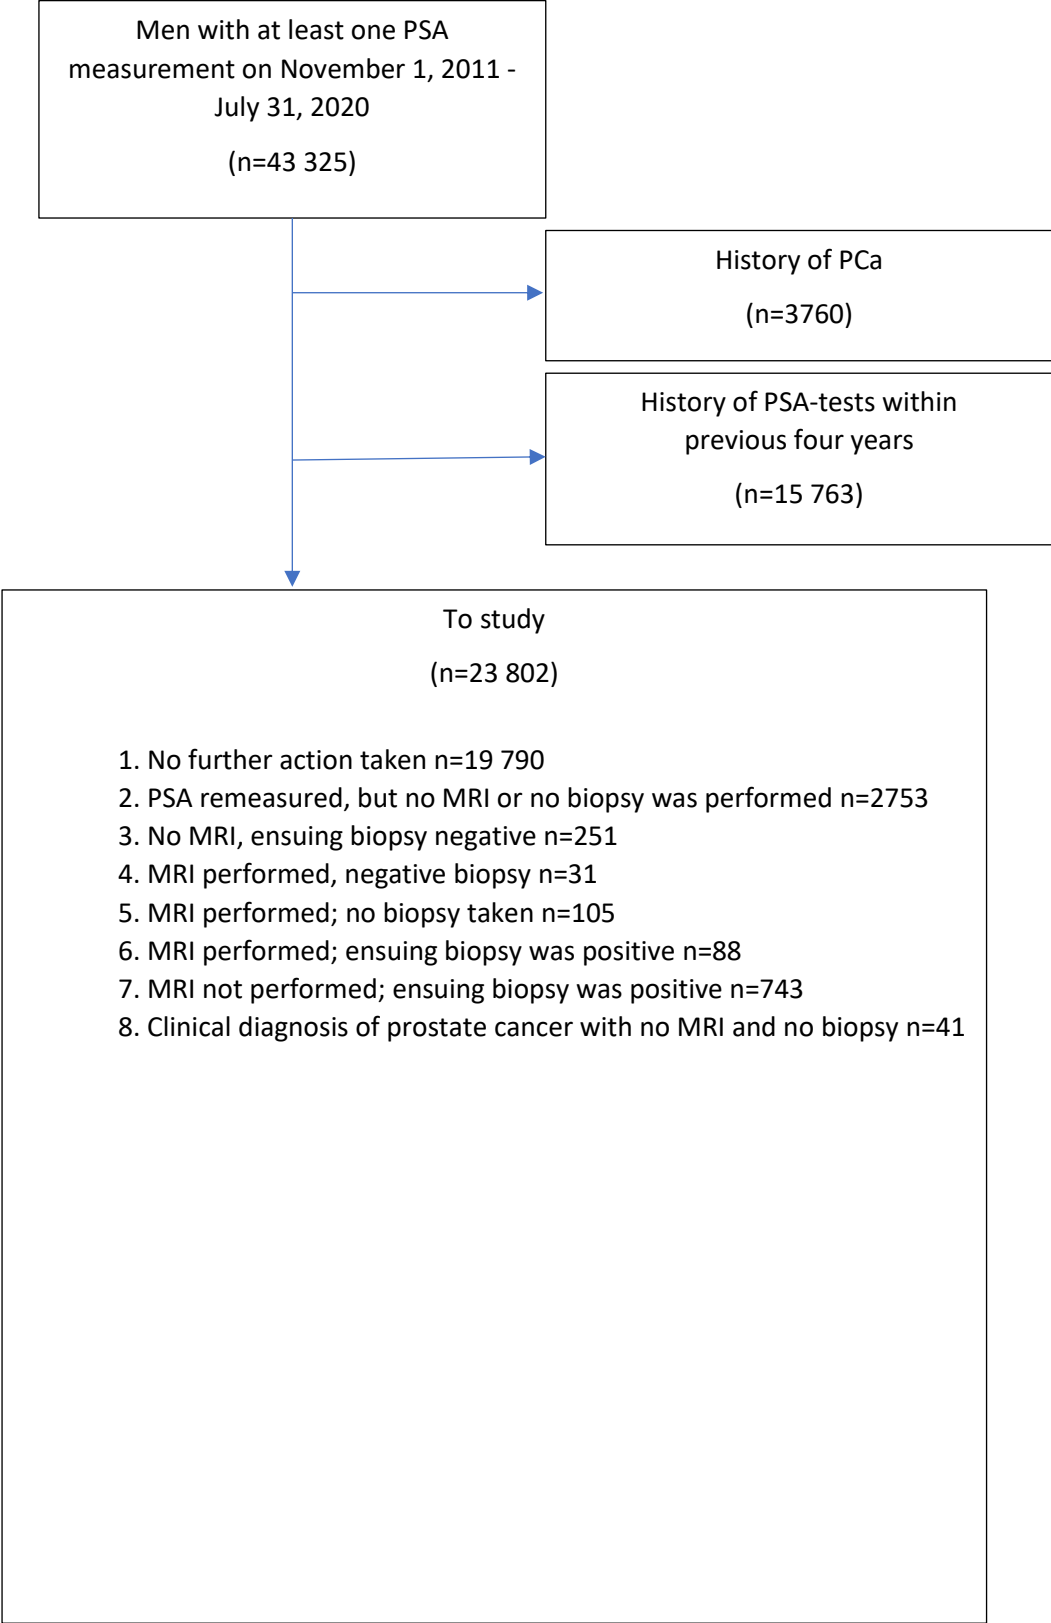

**eTable.** Distribution of Prostate Cancer Characteristics by MRI Investigation for Men Diagnosed With Needle Biopsy Detected Prostate Cancer With First PSA Between 3 and 20 ng/ml and Age Below 80 Years.

|                              | <b>MRI<br/>(n=67)</b> | <b>No MRI<br/>(n=363)</b> | <b>Total<br/>(n=430)</b> |
|------------------------------|-----------------------|---------------------------|--------------------------|
| <b>Age, years n (%)</b>      |                       |                           |                          |
| <=55                         | 9 (13.4)              | 36 (9.9)                  | 45 (10.5)                |
| 56-66                        | 27 (40.3)             | 126 (34.7)                | 153 (35.6)               |
| 66-75                        | 30 (44.8)             | 158 (43.5)                | 188 (43.7)               |
| 76-80                        | 1 (1.5)               | 43 (11.8)                 | 44 (10.2)                |
| <b>T-stage, n (%)</b>        |                       |                           |                          |
| T1ab                         | 1 (1.5)               | 4 (1.1)                   | 5 (1.2)                  |
| T1c                          | 36 (53.7)             | 177 (48.8)                | 213 (49.5)               |
| T2                           | 25 (37.3)             | 152 (41.9)                | 177 (41.2)               |
| T3                           | 5 (7.5)               | 24 (6.6)                  | 29 (6.7)                 |
| T4                           | 0 (0.0)               | 4 (1.1)                   | 4 (0.9)                  |
| TX                           | 0 (0.0)               | 2 (0.6)                   | 2 (0.5)                  |
| <b>PSA-density, n (%)</b>    |                       |                           |                          |
| 0-0.15                       | 20 (29.9)             | 112 (30.9)                | 132 (30.7)               |
| 0.15-0.30                    | 29 (43.3)             | 153 (42.1)                | 182 (42.3)               |
| 0.30+                        | 18 (26.9)             | 90 (24.8)                 | 108 (25.1)               |
| Missing                      | 0 (0.0)               | 8 (2.2)                   | 8 (1.9)                  |
| <b>Gleason, n (%)</b>        |                       |                           |                          |
| 6                            | 11 (16.4)             | 137 (37.7)                | 148 (34.4)               |
| 7(3+4)                       | 30 (44.8)             | 135 (37.2)                | 165 (38.4)               |
| 7(4+3)                       | 15 (22.4)             | 48 (13.2)                 | 63 (14.7)                |
| 8                            | 5 (7.5)               | 21 (5.8)                  | 26 (6.0)                 |
| 9-10                         | 6 (9.0)               | 22 (6.1)                  | 28 (6.5)                 |
| <b>Treatment, n (%)</b>      |                       |                           |                          |
| Active surveillance          | 8 (11.9)              | 88 (24.2)                 | 96 (22.3)                |
| Watchful waiting             | 1 (1.5)               | 26 (7.2)                  | 27 (6.3)                 |
| Radical prostatectomy        | 33 (49.3)             | 132 (36.4)                | 165 (38.4)               |
| Radiation therapy            | 19 (28.4)             | 81 (22.3)                 | 100 (23.3)               |
| Androgen deprivation therapy | 6 (9.0)               | 29 (8.0)                  | 35 (8.1)                 |
| Missing information          | 0 (0.0)               | 7 (1.9)                   | 7 (1.6)                  |
