# Supplementary material for: Frequency of Biopsy and Tumor Grade Before vs After Introduction of Prostate Magnetic Resonance Imaging
Source: PubMed Central journal article supplement (PMC10445184; doi:10.1001/jamanetworkopen.2023.30233), 2023-08-22
Supplement: jamanetwopen-e2330233-s002.pdf [file jamanetwopen-e2330233-s002.pdf]

## Data Sharing Statement

Robinson. Frequency of Biopsy and Tumor Grade Before vs After Introduction of Prostate Magnetic Resonance Imaging. *JAMA Netw Open*. Published August 22, 2023.  
doi:10.1001/jamanetworkopen.2023.30233

### Data

**Data available:** No
